# Supplementary material for: Androgen Deprivation-Induced Senescence Promotes Outgrowth of Androgen-Refractory Prostate Cancer Cells
Source: PubMed Central journal article supplement (PMC3695935; doi:10.1371/journal.pone.0068003), 2013-06-28

A.

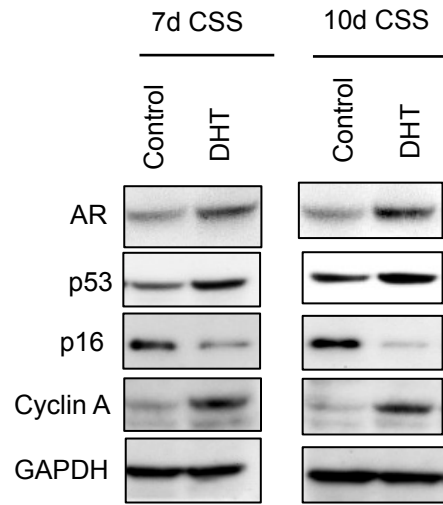

B.

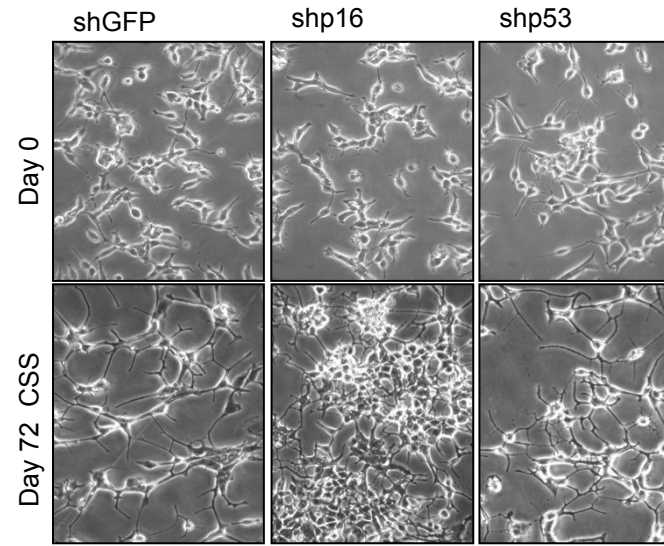

Supplement: pone.0068003.s003.pdf [file pone.0068003.s003.pdf]
